# Supplementary material
Source: PubMed Central journal article supplement (PMC2909280)

A

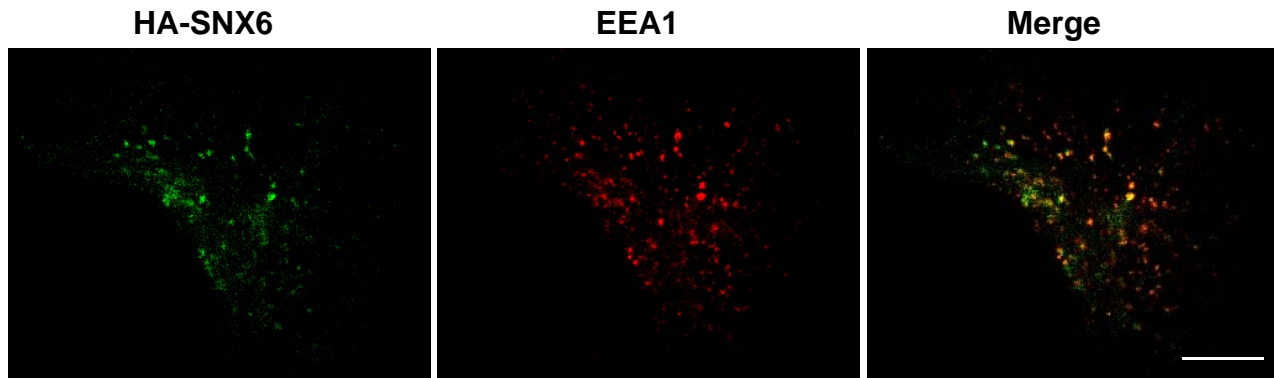

B

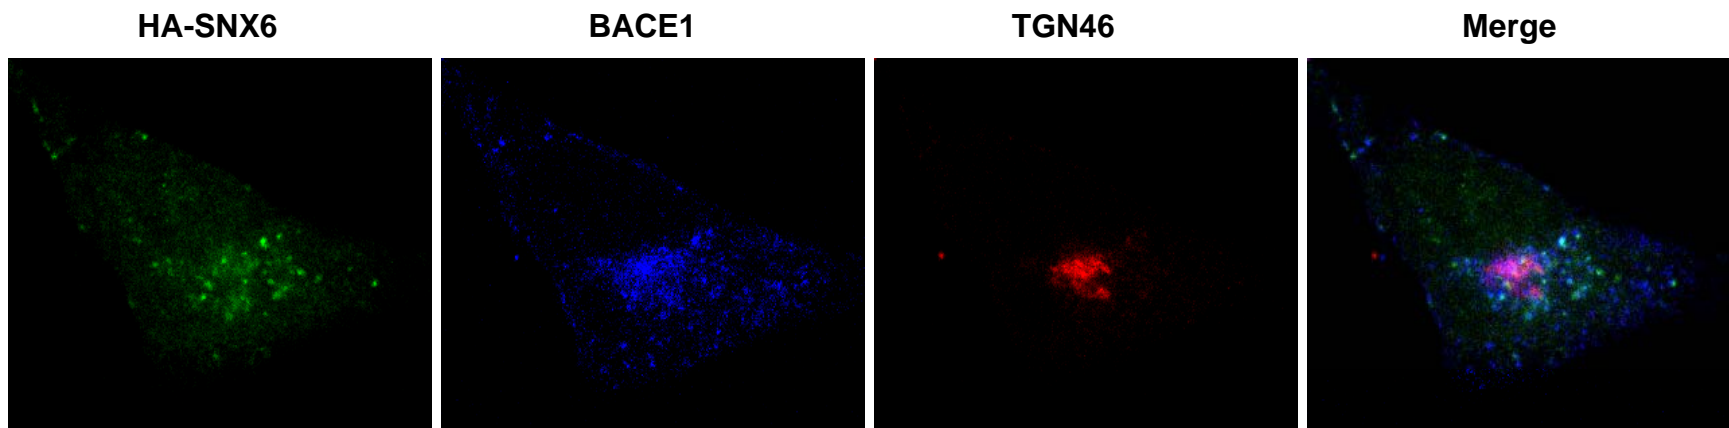

C

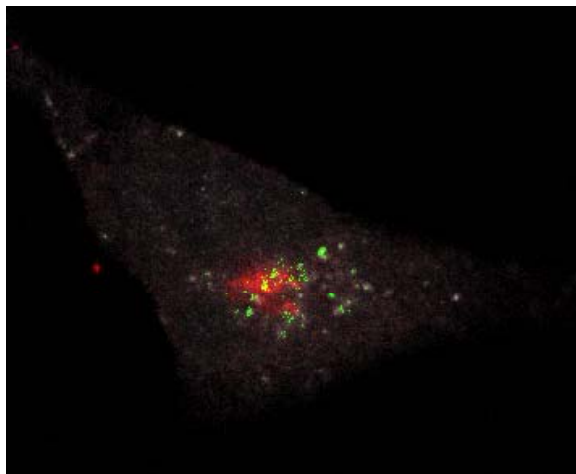

**Green:** co-localization of  
SNX6 and BACE1;  
**Red:** TGN46;  
**White:** HA-SNX6

**A**

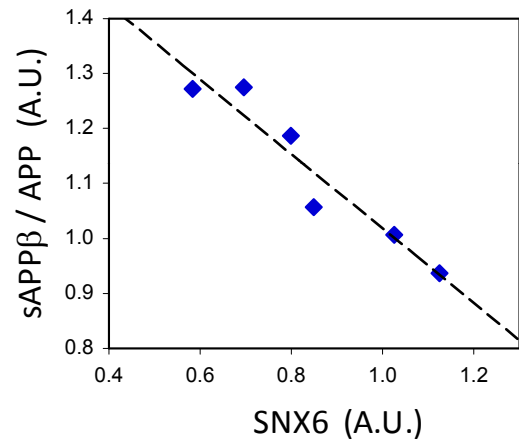

**B**

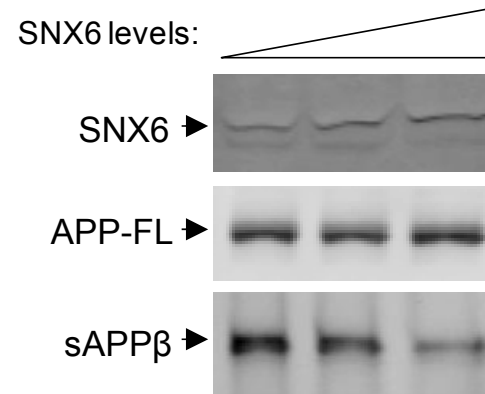

**C**

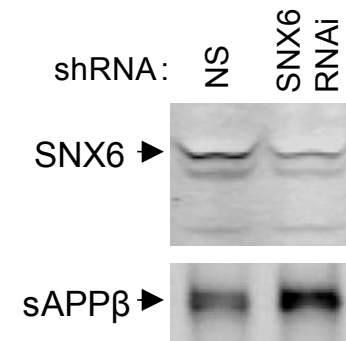

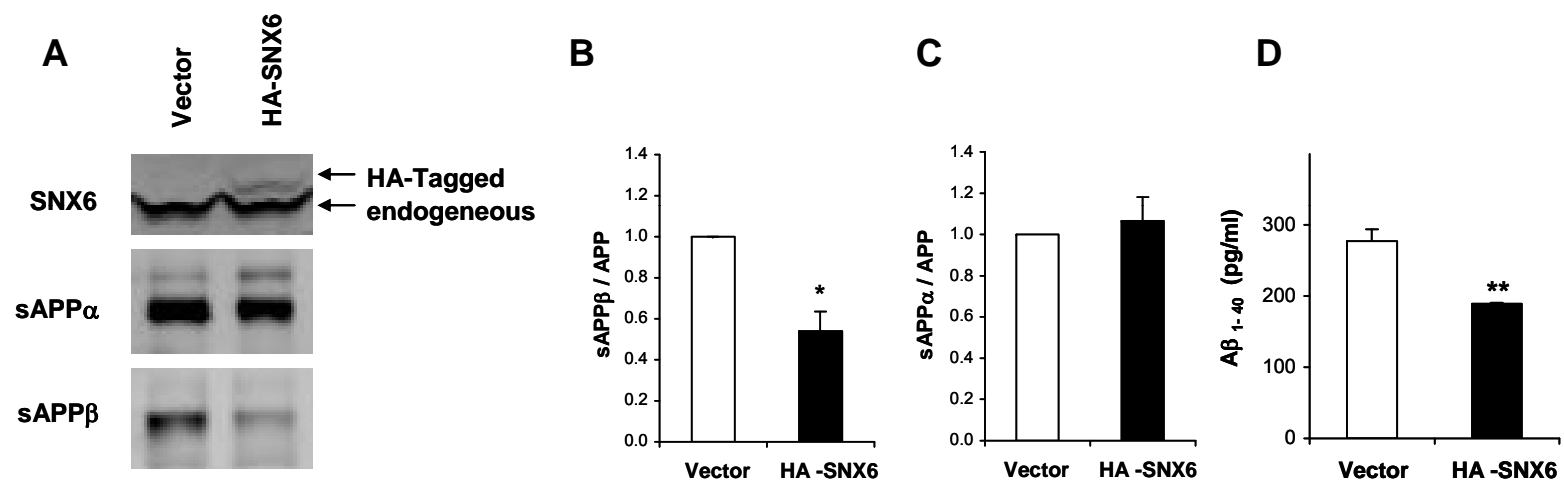

# Supplementary Figure 4

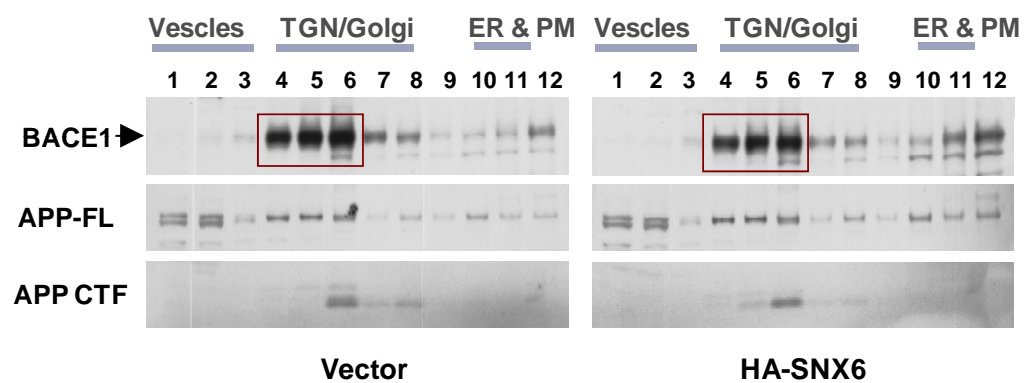

# Supplementary Figure 5

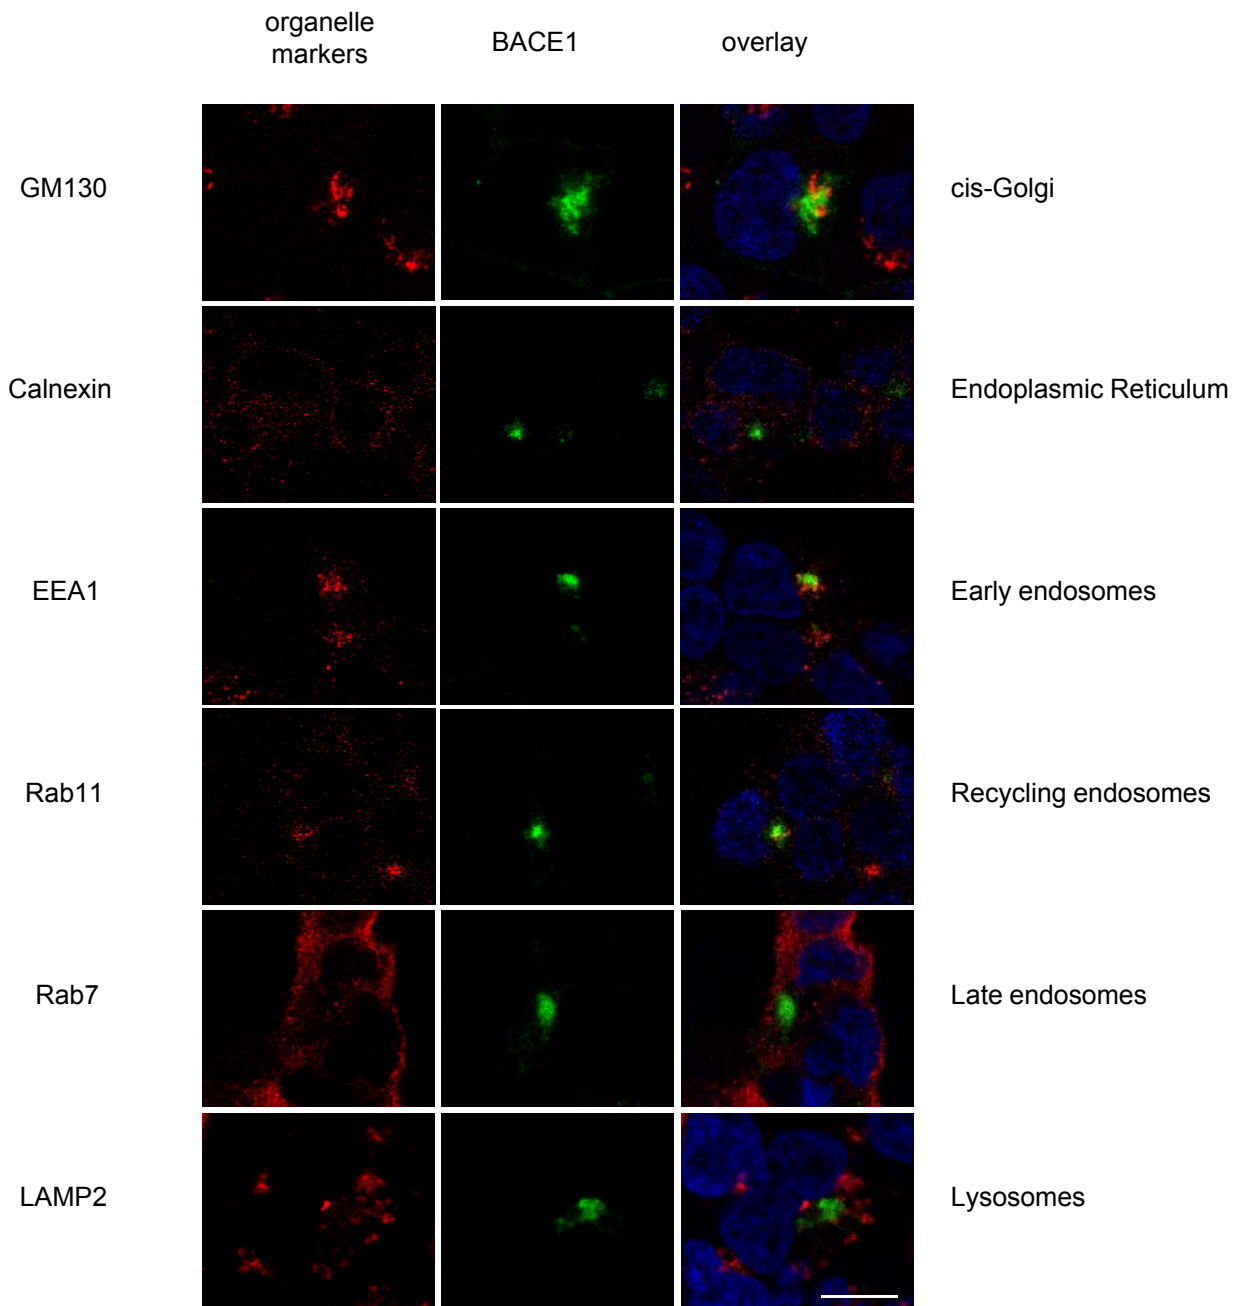

Supplement: supp_fj.09-146357_09-146357SuppFigs.pdf [file supp_fj.09-146357_09-146357SuppFigs.pdf]
